# Supplementary material for: Theoretical insights into Pt–Rh alloy nanoparticles: stability, elemental distribution, and catalytic mechanisms for NO + CO reactions
Source: Royal Society of Chemistry journal article supplement (doi:10.1039/d4cy00755g), 2024-01-01
Supplement: d4cy00755g1.pdf [file d4cy00755g1.pdf]

## Supplementary Materials

of

# Theoretical Insights into Pt-Rh Alloy Nanoparticles: Stability, Elemental Distribution, and Catalytic Mechanisms for NO+CO Reactions

Yuzheng Li<sup>1</sup>, Xianbao Duan<sup>1,\*</sup>, Liu Zhang<sup>2</sup>, Caoran Li<sup>1</sup>, Fangwen Ye<sup>1</sup>, Zhihong Zhang<sup>2</sup>, Liuqing Chen<sup>1</sup>, Chun Du<sup>2</sup>, Qingbo Wang<sup>3</sup>, Bin Shan<sup>2,\*</sup>

<sup>1</sup> Hubei Key Laboratory of Plasma Chemistry and Advanced Materials and School of Materials Science and Engineering, Wuhan Institute of Technology, Wuhan 430205, Hubei, China

<sup>2</sup> State Key Laboratory of Intelligent Manufacturing Equipment and Technology and School of Materials Science and Engineering, Huazhong University of Science and Technology, Wuhan 430074, Hubei, China

<sup>3</sup> School of Mathematics and Physics, China University of Geosciences (Wuhan), Wuhan 430074, Hubei, People's Republic of China

\*Corresponding author: [xbduan@wit.edu.cn](mailto:xbduan@wit.edu.cn), [bshan@mail.hust.edu.cn](mailto:bshan@mail.hust.edu.cn)

### List of contents:

- Usage of constructed Pt-Rh potential
- Supplementary Figures and Tables

## Usage of constructed Pt-Rh potential

The developed machine learning potential for the Pt-Rh system based on the DeePMD model can be obtained from the following link:

[https://drive.google.com/file/d/1DV4Yu7ppldpY9F8xL\\_ZK2RELulDs-Y/view?usp=sharing](https://drive.google.com/file/d/1DV4Yu7ppldpY9F8xL_ZK2RELulDs-Y/view?usp=sharing)

### Usage Instructions:

To simulate a Pt-Rh system, follow these steps:

1. Download the potential file from the link above.
2. Place the potential file in the same directory as the LAMMPS script.
3. Include the following commands in the LAMMPS script to set up the potential:

```
pair_style deepmd Pt-Rh.pb  
pair_coeff * *
```

### Important Notes:

1. Ensure that the order of elements in the atomic model is Pt, Rh.
2. The LAMMPS software must have the plugin that supports DeePMD installed. Specific installation instructions and further information can be found from the DeePMD community.

**Table S1.** Detailed information of the seven involved Pt-Rh nanoparticles.

| Name                                | Property                     | Shape |      |      |      |      |      |      |
|-------------------------------------|------------------------------|-------|------|------|------|------|------|------|
|                                     |                              | CU    | TO   | IH   | TD   | DH   | OH   | SP   |
| <b>Pt<sub>3</sub>Rh<sub>1</sub></b> | <b>Number of Pt atoms</b>    | 1025  | 968  | 1064 | 961  | 1085 | 1095 | 967  |
|                                     | <b>Number of Rh atoms</b>    | 347   | 321  | 351  | 327  | 357  | 374  | 322  |
|                                     | <b>Total number of atoms</b> | 1372  | 1289 | 1415 | 1288 | 1442 | 1469 | 1289 |
|                                     | <b>Diameter (nm)</b>         | 2.80  | 3.14 | 3.15 | 2.75 | 5.03 | 4.71 | 3.40 |
| <b>Pt<sub>1</sub>Rh<sub>1</sub></b> | <b>Number of Pt atoms</b>    | 689   | 641  | 710  | 646  | 720  | 732  | 645  |
|                                     | <b>Number of Rh atoms</b>    | 683   | 648  | 705  | 642  | 722  | 737  | 644  |
|                                     | <b>Total number of atoms</b> | 1372  | 1289 | 1415 | 1288 | 1442 | 1469 | 1289 |
|                                     | <b>Diameter (nm)</b>         | 2.80  | 3.12 | 3.12 | 2.73 | 4.99 | 4.67 | 3.40 |
| <b>Pt<sub>1</sub>Rh<sub>3</sub></b> | <b>Number of Pt atoms</b>    | 337   | 321  | 360  | 324  | 361  | 359  | 309  |
|                                     | <b>Number of Rh atoms</b>    | 1035  | 968  | 1055 | 964  | 1081 | 1110 | 980  |
|                                     | <b>Total number of atoms</b> | 1372  | 1289 | 1415 | 1288 | 1442 | 1469 | 1289 |
|                                     | <b>Diameter (nm)</b>         | 2.80  | 2.97 | 3.10 | 2.71 | 4.95 | 4.64 | 3.40 |

**Table S2.** Detailed statistical information used to construct the machine learning potential of the Pt-Rh system.

| Structure type            | Pt   | Rh   | Pt-Rh | Total |
|---------------------------|------|------|-------|-------|
| <b>Bulk structures</b>    | 1623 | 1623 | 1869  | 5115  |
| <b>Cluster structures</b> | 1062 | 1260 | 231   | 2553  |
| <b>Slab structures</b>    | 600  | 600  | 1816  | 3016  |
| <b>Ordered structures</b> | -    | -    | 1000  | 1000  |
| <b>Total</b>              | 3285 | 3483 | 4916  | 11684 |

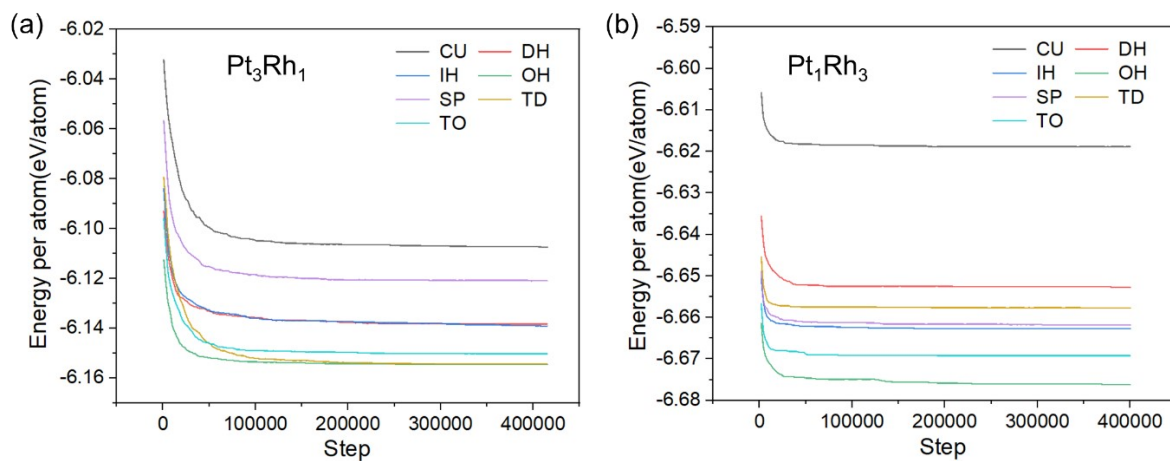

**Fig. S1.** Variation of the average atomic energy of (a)  $Pt_3Rh_1$  and (b)  $Pt_1Rh_3$  NPs with different shapes at 1K as a function of the simulation step.

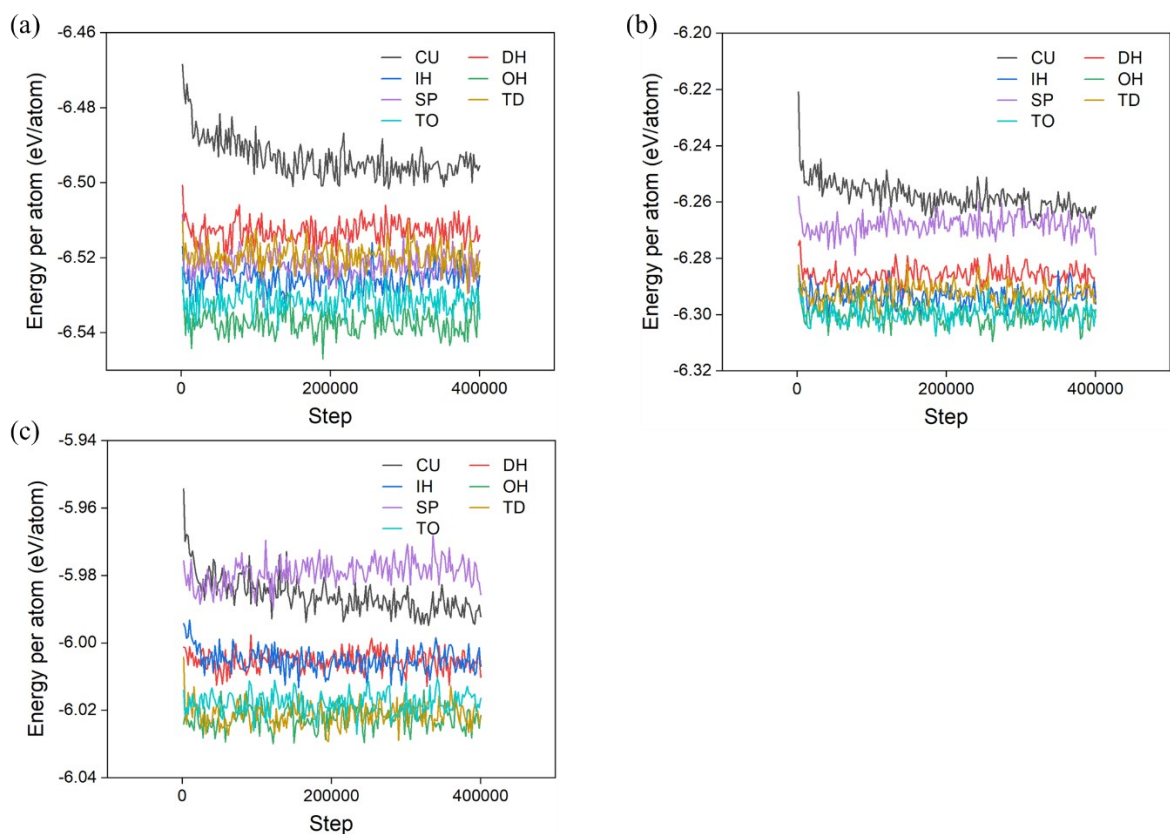

**Fig. S2.** Variation of the average atomic energy of (a)  $Pt_1Rh_3$ , (b)  $Pt_1Rh_1$  and (c)  $Pt_3Rh_1$  NPs in 900K with different shapes at 900K as a function of the simulation step.

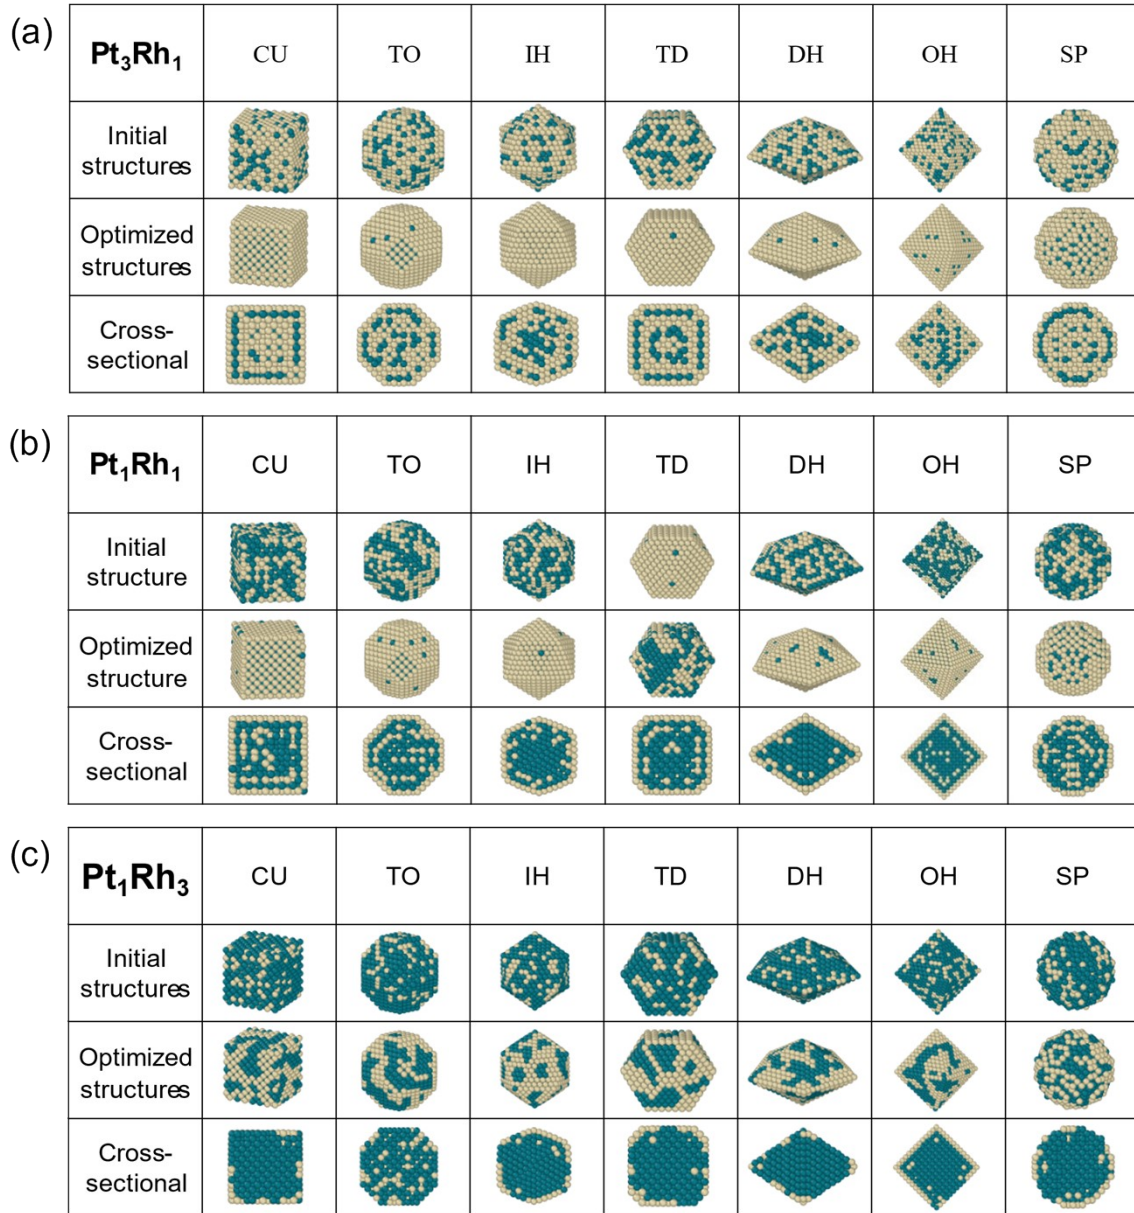

**Fig. S3.** Structural snapshots (including initial structures, optimized structures, and cross-sectional views) for (a)  $\text{Pt}_3\text{Rh}_1$ , (b)  $\text{Pt}_1\text{Rh}_1$ , and (c)  $\text{Pt}_1\text{Rh}_3$  with different shapes.

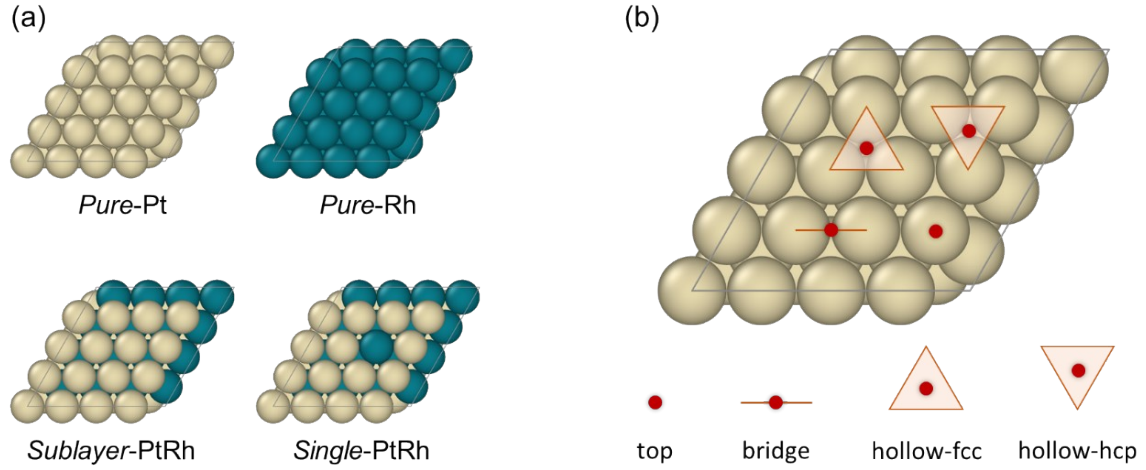

**Fig. S4.** (a) Four surface models constructed from the observed common morphology of the surface distribution of Pt-Rh NPs. (b) Schematic diagram of surface adsorption sites.

**Table S3.** Reaction pathways of  $N_2$  recombination on four different surface models (including *Pure-Pt*, *Pure-Rh*, *Sublayer-PtRh*, and *Single-PtRh* surfaces), along with the corresponding reaction barriers ( $E_a$ ) and reaction enthalpies ( $\Delta E$ ).

| Surface model               | Path | Reaction pathway                                 | $\Delta E$ (eV) | $E_a$ (eV) |
|-----------------------------|------|--------------------------------------------------|-----------------|------------|
| <b><i>Pure-Pt</i></b>       | I    | N(fcc)+N(fcc) $\rightarrow$ N <sub>2</sub> (top) | -1.10           | 2.06       |
|                             | II   | N(hcp)+N(hcp) $\rightarrow$ N <sub>2</sub> (top) | -1.57           | 1.78       |
| <b><i>Pure-Rh</i></b>       | I    | N(hcp)+N(hcp) $\rightarrow$ N <sub>2</sub> (top) | -0.04           | 2.23       |
|                             | II   | N(fcc)+N(fcc) $\rightarrow$ N <sub>2</sub> (top) | -0.28           | 2.00       |
| <b><i>Sublayer-PtRh</i></b> | I    | N(fcc)+N(fcc) $\rightarrow$ N <sub>2</sub> (top) | -1.44           | 1.96       |
|                             | II   | N(hcp)+N(hcp) $\rightarrow$ N <sub>2</sub> (top) | -1.74           | 1.76       |
| <b><i>Single-PtRh</i></b>   | I    | N(fcc)+N(fcc) $\rightarrow$ N <sub>2</sub> (top) | -1.23           | 1.99       |
|                             | II   | N(hcp)+N(hcp) $\rightarrow$ N <sub>2</sub> (top) | -1.31           | 1.93       |

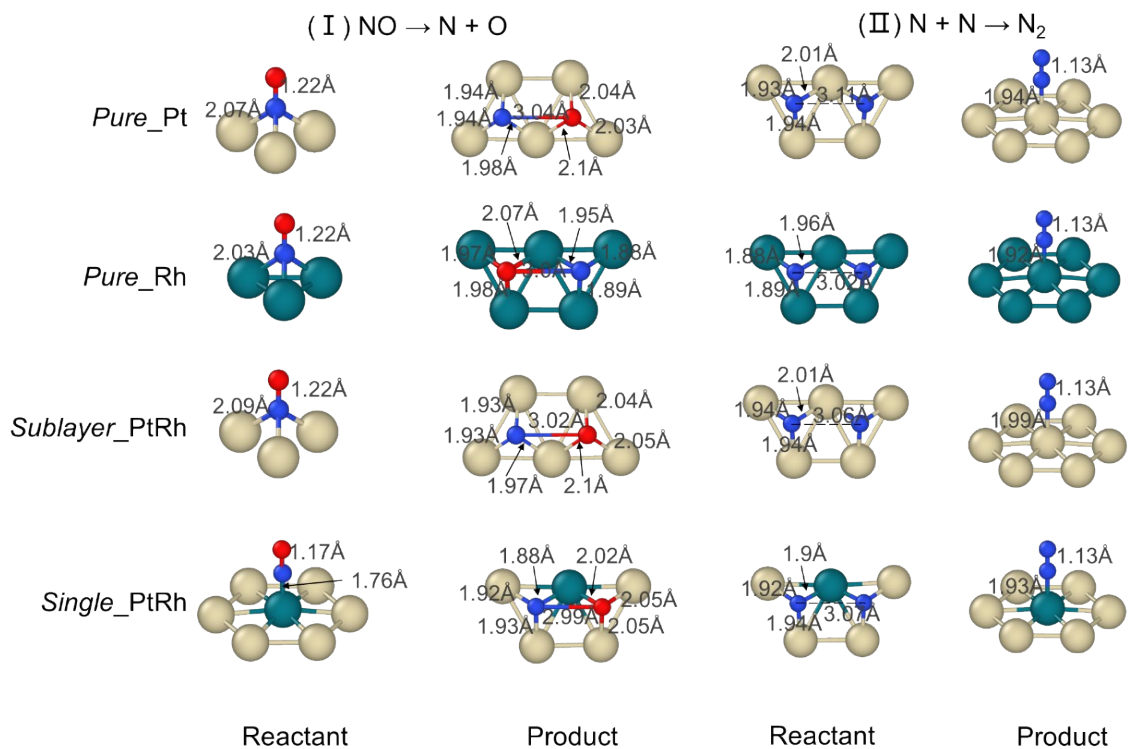

**Fig. S5.** Information on the geometrical structure of the initial and final states in the (a) NO dissociation and (b)  $\text{N}_2$  recombination steps on four involved surface models.

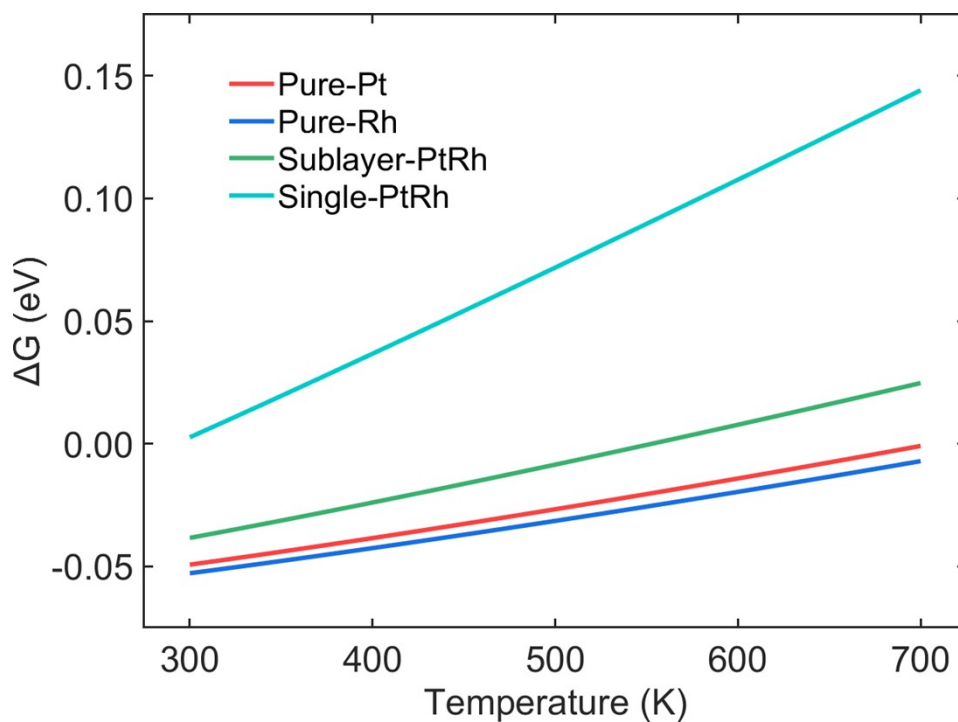

**Fig. S6.** Free energy corrections of NO dissociation barriers at 300K-700K.
